whose members are critical observers of anesthetic procedures, will provide us with a meaningful index of "anesthetic risk."

ARTHUR S. KEATS, M.D.  
*Chief*  
*Division of Cardiovascular Anesthesia*  
*Texas Heart Institute*  
*Houston, Texas*

### References

1. Owens WD, Felts JA, Spitznagel EL Jr: ASA Physical Status Classifications: A study of Consistency of Ratings. *ANESTHESIOLOGY* 49:239-243, 1978
2. Saklad M: Grading of patients for surgical procedures. *ANESTHESIOLOGY* 2:281-284, 1941
3. Dripps RD, Lamont A, Eckenhoff JE: The role of anesthesia in surgical mortality. *JAMA* 178:261-266, 1961
4. New Classification of Physical Status. *ANESTHESIOLOGY* 24: 111, 1963
5. Goldman L, Caldera DL, Nussbaum SR, et al: Multifactorial index of cardiac risk in noncardiac surgical procedures. *N Engl J Med* 297:845-850, 1977
6. Vacanti CJ, Van Houten RJ, Hill RC: A statistical analysis of the relationship of physical status to postoperative mortality in 68,388 cases. *Anesth Analg (Cleve)* 49:564-566, 1970
7. Marx GF, Mateo CV, Orkin LR: Computer analysis of post anesthetic death. *ANESTHESIOLOGY* 39:54-58, 1973
8. Moses LE, Mosteller F: Institutional differences in postoperative death rates. *JAMA* 203:492-494, 1968
9. Goldstein A Jr, Keats AS: The risk of anesthesia. *ANESTHESIOLOGY* 33:130-143, 1970
10. Dripps RD, Eckenhoff JE, Vandam LD: Introduction to Anesthesia: The Principles of Safe Practice. Fifth edition. Philadelphia, W. B. Saunders, 1977, pp 13-15
11. Loop FD, Berrettoni JN, Pichard A, et al: Selection of the candidate for myocardial revascularization: A profile of high risk based on multivariate analysis. *J Thorac Cardiovasc Surg* 69:40-51, 1975

Anesthesiology  
49:236-238, 1978

## *Halothane and Regulation of Respiration*

CONDUCTING RESEARCH on man is potentially hazardous, and often impractical under modern constraints. Nevertheless, physiologic differences among species dictate that pharmacologic and physiologic information learned in laboratory animals be independently verified in man.

The report from London, Ontario, presented elsewhere in this issue of *ANESTHESIOLOGY*,<sup>1</sup> confirms in man important data gathered in dogs, first in San Francisco,<sup>2</sup> and later in Denver.<sup>3</sup> It is of some pragmatic value for the clinician to know that halothane depresses the ventilatory response to hypoxia in man. As further guidelines, codes and regulations for human research continue to evolve,<sup>4</sup> it may become

less likely that we will have repeated opportunities to confirm, in man, the work reported by Drs. Knill and Gelb. It is, therefore, all the more important that this report, and the authors' conclusions, be examined carefully.

One may take issue with some of the methods used. Anesthesia was induced with a barbiturate, which may depress hypoxic stimulation of ventilation for a considerable period.<sup>5</sup> The hypotension seen in the anesthetized subjects may alter chemically induced changes in ventilation.<sup>6,7</sup> Repetitive hypoxic, hypercapnic, or "isocapnic" hypoxic testing may alter central  $P_{CO_2}$  for longer than the time allowed between tests.<sup>8</sup> These objections are relatively minor and do not qualitatively invalidate the results. It remains clear that Drs. Knill and Gelb have demonstrated in man that 0.1 MAC halothane blunts the ventilatory response to hypoxia, while 1.1 and 2.0 MAC halothane severely depress or abolish that response.

Anesthetic concentrations of halothane depress the ventilatory responses to hypercapnia-acidosis ( $CO_2-[H^+]$ ) and hypoxia. It may be debated whether

Key words: Anesthetics, volatile: halothane. Receptors: chemoreceptors. Ventilation: carbon dioxide response; oxygen response; regulation.

The opinions or assertions contained herein are the private views of the author and are not to be construed as official or as reflecting the views of the Department of the Army or the Department of Defense.

one response is depressed to a greater extent than the other. In dogs, the interaction of hypoxia and  $\text{CO}_2$ - $[\text{H}^+]$  in driving ventilation is destroyed by halothane anesthesia.<sup>2</sup> Drs. Knill and Gelb reported that they measured the hypoxic hypercapnic responses during 1.1 MAC halothane in eight subjects, and found a decrease in slope of  $\dot{V}_E$  vs.  $P_{\text{CO}_2}$  from  $0.25 \text{ l} \cdot \text{min}^{-1} \cdot \text{torr}^{-1}$  during normoxia to  $0.18 \text{ l} \cdot \text{min}^{-1} \cdot \text{torr}^{-1}$  during hypoxia. Unfortunately they did not include either individual data or statistical assessment to allow the reader critically to evaluate the data.

Perhaps the most interesting and surprising information they present is that in a concentration as low as 0.1 MAC halothane greatly decreases the ventilatory response to hypoxia, while failing to alter the ventilatory response to  $\text{CO}_2$ - $[\text{H}^+]$ . Yacoub *et al.*<sup>9</sup> obtained similar results in human subjects breathing nitrous oxide, 30–50 per cent.

Despite the finding of Drs. Knill and Gelb that halothane also blunts the ventilatory response to doxapram, we should be careful about concluding that halothane exerts its ventilatory effects solely through the carotid body. Although doxapram appears to stimulate ventilation in parallel with hypoxia,<sup>8,10</sup> it is not certain that in man the pharmacologic action of doxapram is mediated through the carotid body. Biscoe and Millar failed to show a decrease in firing of the carotid sinus nerve in response to hypoxia when halothane was added to pentobarbital anesthesia in cats,<sup>6</sup> although that result may have been caused by a limitation of their experimental design. Human subjects, following denervation<sup>11</sup> of their carotid chemoreceptors, show respiratory depression with hypoxia. The cause may be frank central neural depression or cerebral blood flow-mediated decrease in  $\text{CO}_2$ - $[\text{H}^+]$  stimulation.<sup>8</sup> Those subjects<sup>11</sup> did not (with two exceptions), manifest depression of slope of  $\dot{V}_E$  vs.  $P_{\text{CO}_2}$  when challenged with hypoxia. Weiskopf *et al.*<sup>2</sup> did demonstrate such depression in dogs, with halothane. The nature of the response shown by the subjects of Knill and Gelb is not clear from the data presented. If all their subjects manifested depression similar to that which I was able to calculate for the single subject whose data are presented in their figure 2, then it would appear that halothane in man causes depression greater than that caused by complete loss of carotid-body function. Thus, whereas the depression of the chemical drive to ventilation may, in part, include

a mechanism involving the carotid body, it would appear that at least one additional site of action must also be involved, as we have previously observed.<sup>2</sup>

Evidence for such an additional site may now be found in the work of Derenne *et al.*,<sup>12</sup> Tusiewicz *et al.*,<sup>13</sup> and Jones *et al.*<sup>14</sup> Derenne *et al.*<sup>12</sup> found during methoxyflurane anesthesia, in man, a relatively unchanged central drive producing a decreased tidal volume as a result of an increased effective elastance of the respiratory system. Tusiewicz *et al.*<sup>13</sup> and Jones *et al.*<sup>14</sup> showed that halothane depresses the increase in that part of the ventilatory response to  $\text{CO}_2$ - $[\text{H}^+]$  performed by the intercostal muscles. This may, in part, be due to elimination of non-respiratory-related neural input to the alpha motor neurons of the intercostal muscles.

Much of Drs. Knill and Gelb's discussion regarding the function of the carotid body and the effects of anesthetics is speculative. Physiologists do not agree how the carotid body transduces low  $P_{\text{O}_2}$ , or high  $P_{\text{CO}_2}$ -low  $[\text{H}^+]$ , into increased ascending neural traffic. It is difficult to describe effects of anesthetic agents upon a poorly understood physiologic process. Nevertheless, the clinician should be aware of a few important points. Halothane in anesthetic and subanesthetic concentrations depresses man's ventilatory response to hypoxia. Nitrous oxide has a similar effect in concentrations of less than 50 per cent. Low doses of narcotics and barbiturates have similar effects. The clinician should be alerted that the old dictum hailing the carotid body as the "ultimum moriens" (last to die)<sup>15</sup> can no longer be functionally applied to the practice of anesthesia. A patient who is anesthetized with a general anesthetic, or who is recovering from general anesthesia or premedication, should be regarded as having greatly diminished, if not absent, ventilatory chemoreflexes, and he should be attended to accordingly.

RICHARD B. WEISKOPF, M.D., LTC, MC  
Chief, Division of Combat and Experimental Surgery  
Department of Surgery  
Letterman Army Institute of Research  
Presidio of San Francisco, California 94129

## References

1. Knill RL, Gelb AW: Ventilatory responses to hypoxia and hypercapnia during halothane sedation and anesthesia in man. *ANESTHESIOLOGY* 49:244–251, 1978
2. Weiskopf RB, Raymond LW, Severinghaus JW: Effects of halothane on canine respiratory responses to hypoxia with and without hypercarbia. *ANESTHESIOLOGY* 41:350–359, 1974
3. Hirshman CA, McCullough RE, Cohen PJ, et al: Depression

\* Weiskopf RB, Gabel RA: Doxapram in awake man: Comparison with hypoxia in stimulation of ventilation (abstr). American Society of Anesthesiologists Annual Meeting, 1974, pp 195–196.

- of hypoxic ventilatory response by halothane, enflurane and isoflurane in dogs. *Br J Anaesth* 49:957-963, 1977
4. Protection of Human Subjects: Policies and Procedures. Federal Register, vol 38, No. 221 (Nov 16, 1973). Revised, Federal Register, vol 39, No. 165 (Aug 23, 1974)
  5. Hirshman CA, McCullough RE, Cohen PJ, et al: Effect of pentobarbitone on hypoxic ventilatory drive in man. *Br J Anaesth* 47:963-968, 1975
  6. Biscoe TJ, Millar RA: Effects of inhalation anesthetics on carotid body chemoreceptor activity. *Br J Anaesth* 40:2-12, 1968
  7. Heymans C, Neil E: Reflexogenic areas of the cardiovascular system. Boston, Little, Brown, 1958
  8. Weiskopf RB, Gabel RA: Depression of ventilation during hypoxia in man. *J Appl Physiol* 39:911-915, 1975
  9. Yacoub O, Doell D, Kryger MH, et al: Depression of hypoxic ventilatory response by nitrous oxide. *ANESTHESIOLOGY* 45:385-389, 1976
  10. Severinghaus J, Ozanne G, Massuda Y: Measurement of the ventilatory response to hypoxia. *Chest* 70:121-124, 1976
  11. Wade JG, Larson CP Jr, Hickey RF, et al: Effect of carotid endarterectomy on carotid chemoreceptor and baroreceptor function in man. *N Engl J Med* 282:823-829, 1970
  12. Derenne J-P, Couture J, Iscoe S, et al: Occlusion pressures in man rebreathing CO<sub>2</sub> under methoxyflurane anesthesia. *J Appl Physiol* 40:805-814, 1976
  13. Tusiewicz K, Bryan AC, Froese AB: Contributions of changing rib-cage-diaphragm interactions to the ventilatory depression of halothane anesthesia. *ANESTHESIOLOGY* 47:327-337, 1977
  14. Jones JG, Faithful D, Minty BD: The relative contribution to tidal breathing of the chest wall and the abdomen in awake and anesthetized subjects. *Br J Anaesth* 48:412, 1976
  15. Schmidt CF: Respiration, Macleod's Physiology in Modern Medicine, Eighth edition. Edited by Bard P. St. Louis, C. V. Mosby, 1938

*The appearance of the code at the bottom of the first page of an article in this journal indicates the copyright owner's consent that copies of the article may be made for personal or internal use, or for personal or internal use of specific clients. This consent is given on the condition, however, that the copier pay the stated per-copy fee through the Copyright Clearance Center, Inc., P.O. Box 765, Schenectady, New York 12301, for copying beyond that permitted by Sections 107 or 108 of the U.S. Copyright Law. This consent does not extend to other kinds of copying, such as copying for general distribution, for advertising or promotional purposes, for creating new collective works, or for resale.*
